# Supplementary material
Source: MDPI journal article supplement (https://www.mdpi.com/1424-2818/11/5/80)
Supplement: s1 [file s1]

# Plant Part Age and Size Affect Sessile Macrobenthic Assemblages Associated with a Foliose Red Algae *Phycodrys rubens* in the White Sea

Alexandra Chava, Anna Artemieva and Eugeni Yakovis

## INDEX

- Page 3**     **Figure S1.** Size structure of *Phycodrys rubens* and its proportion compared to other red macroalgal species in September 2015 and 2016 by site and frame.
- Page 4**     **Table S1.** Average number and wet weight of foliose red algae per 1 m<sup>2</sup> of the bottom in September-October by species and year.
- Page 5**     **Table S2.** Contribution of 20 largest *Phycodrys rubens* plants to approximated total area in a frame and total wet weight in September-October by year, site and frame.
- Page 6**     **Table S3.** Approximated surface area of *Phycodrys rubens* per 1 m<sup>2</sup> in September-October by plant part age, site and year, frames pooled.
- Page 7**     **Table S4.** Mann-Whitney U-tests comparing total cover of the epibiosis on *Phycodrys rubens* in September 2015 between the two replicate frames by site and plant part age.
- Page 8**     **Table S5.** Kolmogorov–Smirnov and Mann-Whitney U-tests comparing total plant surface areas and the proportion of young blades' surface of *Phycodrys rubens* between the pairs of replicate frames in September 2015 by sampling site.
- Page 9**     **Table S6.** Effects of plant part age, month, and location on total cover of *Phycodrys rubens* epibiosis (alternative analysis with Frame factor included).
- Page 11**    **Table S7.** Effects of plant part age, month, and location on multivariate community structure of epibiosis on *Phycodrys rubens* (alternative analysis with Frame factor included).
- Page 12**    **Table S8.** Effects of plant part size and location on total cover on young and old plant parts of *Phycodrys rubens* in September 2015 (alternative analysis with Frame factor included).
- Page 13**    **Table S9.** Effects of plant part size and location on the number of species and diversity on young and old plant parts of *Phycodrys rubens* in September 2015 (alternative analysis with Frame factor included).
- Page 14**    **Table S10.** Effects of plant part size and location on multivariate community structure of epibiosis on young and old plant parts of *Phycodrys rubens* in September 2015 (alternative analysis with Frame factor included).

**Page 15**    **Table S11.** Effects of plant part size and location on mean individual size of 5 top abundant species on young and old plant parts of *Phycodrys rubens* in September 2015.

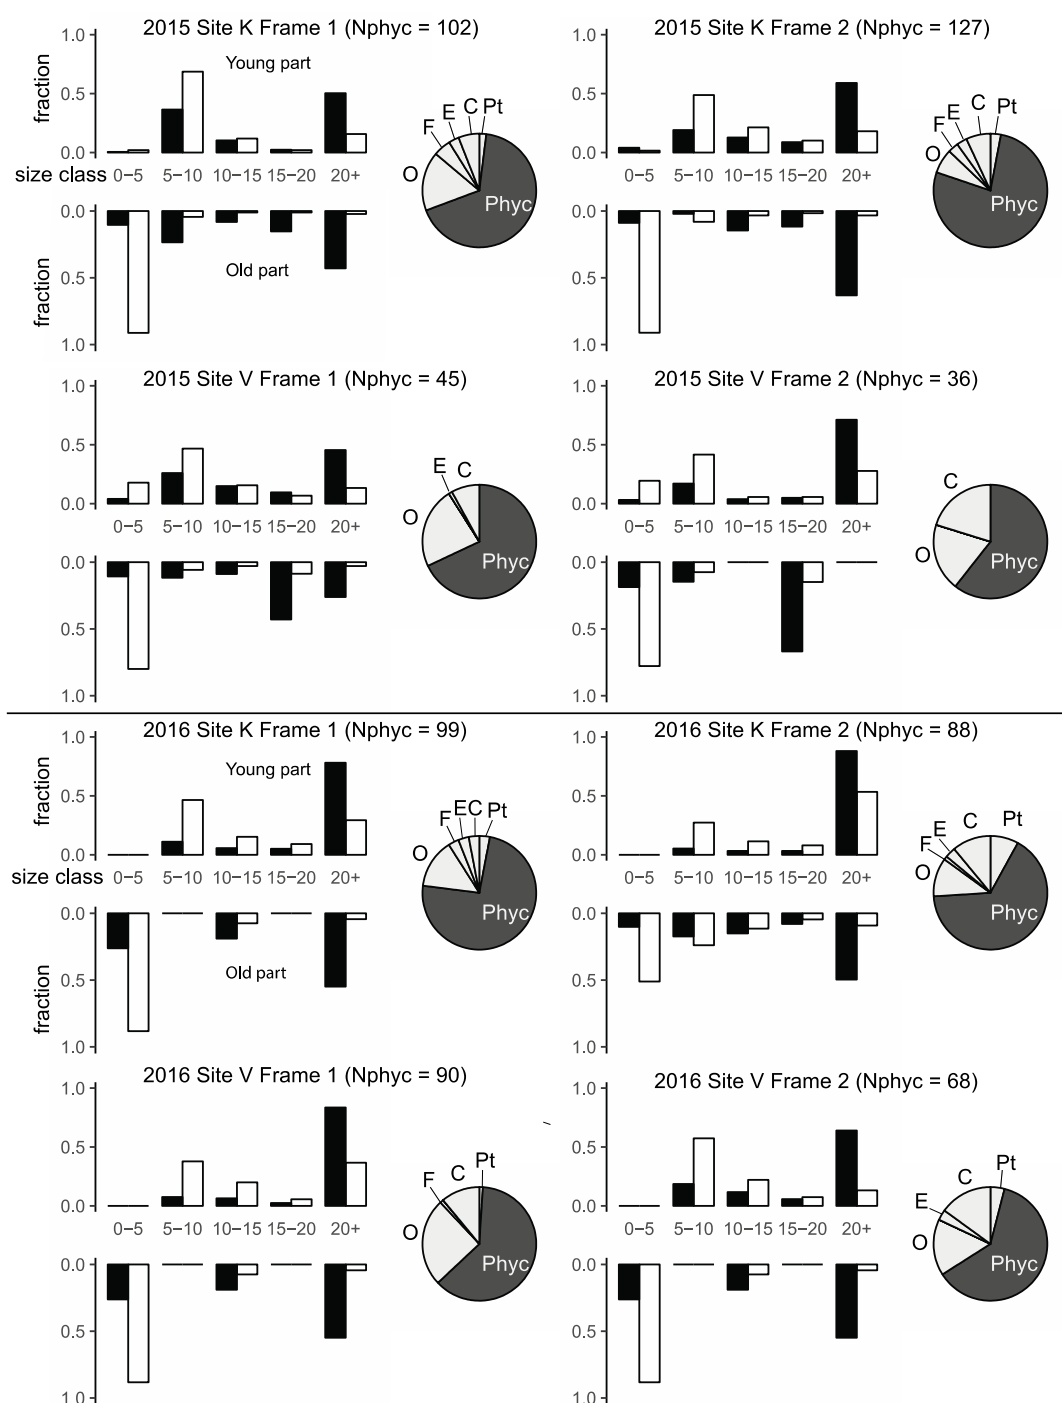

**Figure S1.** Size structure of *Phycodrys rubens* and its proportion compared to other red macroalgal species on September 24, 2015 and October 1, 2016 by site and frame. Barcharts: distribution of *P. rubens* individuals by approximated blade surface area (white bars) and their contributions to total *P. rubens* surface area (black bars). Young plant parts plotted upwards, old plant parts plotted downwards, size classes denote approximated blade surface area of the corresponding part in cm<sup>2</sup>. Piecharts: relative wet weights of red macroalgae by species. Phyc – *P. rubens*; O – *Odonthalia dentata*; F – *Fimbrifolium dichotomum*; E – *Euthora cristata*; C – *Coccotylus truncatus*; Pt – *Ptilota gunneri*. N<sub>phyc</sub> – number of *P. rubens* individuals in a 0.25 m<sup>2</sup> frame.

**Table S1.** Average number (N) and wet weight (W) in grams of foliouse red algae per 1 m<sup>2</sup> of the bottom in September-October by species and year ( $n = 4$  frames, sites pooled).

| Year |   | <i>Phycodrys<br/>Rubens</i> | <i>Odonthalia<br/>Dentata</i> | <i>Fimbrifolium<br/>Dichotomum</i> | <i>Coccotylus<br/>Truncatus</i> | <i>Euthora<br/>Cristata</i> | <i>Ptilota<br/>Gunneri</i> |
|------|---|-----------------------------|-------------------------------|------------------------------------|---------------------------------|-----------------------------|----------------------------|
| 2015 | N | 310 ± 88                    | 56 ± 7                        | 21 ± 10                            | 88 ± 15                         | 25 ± 10                     | 18 ± 9                     |
|      | W | 130.3 ± 29.3                | 27.3 ± 3.0                    | 4.6 ± 2.4                          | 18.2 ± 4.7                      | 3.4 ± 1.8                   | 2.5 ± 1.6                  |
| 2016 | N | 342 ± 24                    | 107 ± 17                      | 8 ± 4                              | 90 ± 25                         | 42 ± 11                     | 48 ± 15                    |
|      | W | 357.6 ± 64.0                | 90.9 ± 27.6                   | 6.6 ± 4.1                          | 52.4 ± 15.1                     | 9.8 ± 3.6                   | 22.7 ± 11.4                |

**Table S2.** Contribution of 20 largest *Phycodrys rubens* plants to approximated total area in a frame (ATA) and total wet weight (TWW) in September-October by year, site and frame.

| Sampling Date                      | September 24, 2015 |      |     |     | October 1, 2016 |      |      |      |
|------------------------------------|--------------------|------|-----|-----|-----------------|------|------|------|
| Site                               | K                  | K    | V   | V   | K               | K    | V    | V    |
| Frame                              | 1                  | 2    | 1   | 2   | 1               | 2    | 1    | 2    |
| ATA, cm <sup>2</sup>               | 1528               | 2795 | 716 | 814 | 3911            | 4397 | 4134 | 1873 |
| ATA of 20 largest, cm <sup>2</sup> | 884                | 1793 | 448 | 404 | 2859            | 2789 | 2936 | 1341 |
| %ATA of 20 largest                 | 58                 | 64   | 63  | 50  | 73              | 63   | 71   | 72   |
| TWW, g                             | 30                 | 54   | 24  | 23  | 96              | 112  | 104  | 42   |
| TWW of 20 largest, g               | 24                 | 37   | 23  | 22  | 80              | 82   | 86   | 38   |
| %TWW of 20 largest                 | 81                 | 68   | 97  | 96  | 83              | 73   | 82   | 91   |

**Table S3.** Approximated surface area (cm<sup>2</sup>) of *Phycodrys rubens* per 1 m<sup>2</sup> in September–October by plant part age, site and year, frames pooled.

| Sampling Date      | Site | Young Parts Area | Old Parts Area | Total Area |
|--------------------|------|------------------|----------------|------------|
| September 24, 2015 | K    | 15558            | 1733           | 17291      |
| September 24, 2015 | V    | 5221             | 898            | 6118       |
| October 1, 2016    | K    | 27102            | 6131           | 33233      |
| October 1, 2016    | V    | 19673            | 4357           | 24030      |

**Table S4.** Mann-Whitney U-tests comparing total cover of the epibiosis on *Phycodrys rubens* in September 2015 between the two replicate frames by site and plant part age.

| Site | Plant Part Age | Subsample             | U   | Z      | p     | N <sub>1</sub> | N <sub>2</sub> |
|------|----------------|-----------------------|-----|--------|-------|----------------|----------------|
| K    | young          | random plants only    | 95  | −0.705 | 0.481 | 15             | 15             |
| V    | young          | random plants only    | 102 | −0.415 | 0.678 | 15             | 15             |
| K    | old            | random plants only    | 12  | −1.240 | 0.215 | 4              | 11             |
| V    | old            | random plants only    | 15  | 0.091  | 0.927 | 5              | 6              |
| K    | young          | random + large plants | 187 | −0.338 | 0.735 | 20             | 20             |
| V    | young          | random + large plants | 170 | −0.798 | 0.425 | 20             | 20             |
| K    | old            | random + large plants | 38  | −1.897 | 0.058 | 9              | 16             |
| V    | old            | random + large plants | 55  | 0.035  | 0.972 | 10             | 11             |

**Table S5.** Kolmogorov–Smirnov (KS) and Mann–Whitney (MW) U-tests comparing total plant surface areas and the proportion of young blades' surface of *Phycodrys rubens* between the pairs of replicate frames in September 2015 by sampling site. Sample sizes for randomly sampled plants  $N_1 = N_2 = 15$ , for random + large plants  $N_1 = N_2 = 20$ ; see text for details.

| Variable                            | Site | Subsample             | KS-test |       | MW U-test |        |       |
|-------------------------------------|------|-----------------------|---------|-------|-----------|--------|-------|
|                                     |      |                       | D       | p     | U         | Z      | p     |
| Total plant surface area            | K    | random plants only    | 0.4     | 0.136 | 73        | −1.618 | 0.106 |
| Total plant surface area            | V    | random plants only    | 0.2     | 0.89  | 102.5     | −0.394 | 0.693 |
| Proportion of young blades' surface | K    | random plants only    | 0.47    | 0.051 | 70        | −1.862 | 0.063 |
| Proportion of young blades' surface | V    | random plants only    | 0.2     | 0.89  | 103       | −0.432 | 0.666 |
| Total plant surface area            | K    | random + large plants | 0.3     | 0.275 | 153       | −1.258 | 0.208 |
| Total plant surface area            | V    | random + large plants | 0.15    | 0.965 | 182.5     | −0.46  | 0.646 |
| Proportion of young blades' surface | K    | random + large plants | 0.35    | 0.135 | 149       | −1.403 | 0.161 |
| Proportion of young blades' surface | V    | random + large plants | 0.15    | 0.965 | 184       | −0.444 | 0.657 |



**Table S6.** Effects of plant part age (fixed, young or old), month (fixed, July or September), and location (fixed, sites K or V) on total cover of *Phycodrys rubens* epibiosis in 2015: beta-regression, mean (logit link) and variance (log link) modeled, replicate 0.25 m<sup>2</sup> frames included as a fixed effect nested in Site × Month with two levels per site (see Methods for details). Auxiliary non-randomly sampled (in September only) five largest plants per frame not included. Significant terms in a mean model highlighted in bold.

|                                                                                                                                  |                  | Model | Source of Variation                            | Estimate       | SE            | t-value       | p                |
|----------------------------------------------------------------------------------------------------------------------------------|------------------|-------|------------------------------------------------|----------------|---------------|---------------|------------------|
| Plants having both old and young parts (with Plant ID as a random blocking factor nested in Site × Month × Frame; n = 51 plants) | Mean (Mu)        |       | Intercept                                      | −5.4548        | 0.5373        | −10.152       | <0.001           |
|                                                                                                                                  |                  |       | Site [level 'K']                               | −0.1024        | 0.2202        | −0.465        | 0.643            |
|                                                                                                                                  |                  |       | <b>Age [level 'Old']</b>                       | <b>3.4217</b>  | <b>0.9030</b> | <b>3.789</b>  | <b>&lt;0.001</b> |
|                                                                                                                                  |                  |       | <b>Month [level 'September']</b>               | <b>3.1399</b>  | <b>0.5164</b> | <b>6.080</b>  | <b>&lt;0.001</b> |
|                                                                                                                                  |                  |       | <b>Frame (Site × Month) [level 'Jul K-2']</b>  | <b>−1.5023</b> | <b>0.5688</b> | <b>−2.641</b> | <b>0.010</b>     |
|                                                                                                                                  |                  |       | <b>Frame (Site × Month) [level 'Jul K-3']</b>  | <b>−1.4284</b> | <b>0.5972</b> | <b>−2.392</b> | <b>0.019</b>     |
|                                                                                                                                  |                  |       | Frame (Site × Month) [level 'Jul V-1']         | 1.1732         | 0.6625        | 1.771         | 0.081            |
|                                                                                                                                  |                  |       | Frame (Site × Month) [level 'Jul V-2']         | 0.6429         | 0.6624        | 0.971         | 0.335            |
|                                                                                                                                  |                  |       | Frame (Site × Month) [level 'Jul V-3']         | 0.1390         | 0.8822        | 0.158         | 0.875            |
|                                                                                                                                  |                  |       | Frame (Site × Month) [level 'Sep K-1']         | −0.2771        | 0.2257        | −1.228        | 0.224            |
|                                                                                                                                  |                  |       | Frame (Site × Month) [level 'Sep V-1']         | −0.1017        | 0.2088        | −0.487        | 0.628            |
|                                                                                                                                  | Variance (Sigma) |       | Site × Age                                     | 1.9685         | 0.9996        | 1.969         | 0.053            |
|                                                                                                                                  |                  |       | <b>Age × Month</b>                             | <b>−2.1639</b> | <b>0.9617</b> | <b>−2.250</b> | <b>0.027</b>     |
|                                                                                                                                  |                  |       | Site × Age × Month                             | −0.6280        | 1.1178        | −0.562        | 0.576            |
|                                                                                                                                  |                  |       | Intercept                                      | −2.4697        | 0.4795        | −5.150        | <0.001           |
|                                                                                                                                  |                  |       | Site [level 'K']                               | 0.3145         | 0.3915        | 0.803         | 0.424            |
|                                                                                                                                  |                  |       | Age [level 'Old']                              | 1.9101         | 0.9761        | 1.957         | 0.054            |
|                                                                                                                                  |                  |       | Month [level 'September']                      | 0.3541         | 0.3940        | 0.899         | 0.372            |
|                                                                                                                                  |                  |       | <b>Frame (Site × Month) [level 'Jul K-2']</b>  | <b>−1.7496</b> | <b>0.4308</b> | <b>−4.061</b> | <b>&lt;0.001</b> |
|                                                                                                                                  |                  |       | <b>Frame (Site × Month) [level 'Jul K-3']</b>  | <b>−1.9890</b> | <b>0.6384</b> | <b>−3.115</b> | <b>0.003</b>     |
|                                                                                                                                  |                  |       | Frame (Site × Month) [level 'Jul V-1']         | 0.4871         | 0.5544        | 0.879         | 0.382            |
|                                                                                                                                  |                  |       | Frame (Site × Month) [level 'Jul V-2']         | 0.1603         | 0.5965        | 0.269         | 0.789            |
|                                                                                                                                  |                  |       | Frame (Site × Month) [level 'Jul V-3']         | −1.0625        | 1.4861        | −0.715        | 0.477            |
|                                                                                                                                  |                  |       | Frame (Site × Month) [level 'Sep K-1']         | −0.6590        | 0.3919        | −1.681        | 0.097            |
|                                                                                                                                  |                  |       | Frame (Site × Month) [level 'Sep V-1']         | −0.1210        | 0.3742        | −0.323        | 0.747            |
|                                                                                                                                  |                  |       | Site × Age                                     | 1.2289         | 1.1222        | 1.095         | 0.277            |
|                                                                                                                                  |                  |       | Age × Month                                    | 0.0453         | 1.0499        | 0.043         | 0.966            |
|                                                                                                                                  |                  |       | Site × Age × Month                             | −0.1733        | 1.2399        | −0.140        | 0.889            |
| Plants having only young parts (n = 39 plants)                                                                                   | Mean (Mu)        |       | Intercept                                      | −3.1035        | 0.2552        | −12.162       | <0.001           |
|                                                                                                                                  |                  |       | <b>Site [level 'K']</b>                        | <b>−0.4005</b> | <b>0.1768</b> | <b>−2.265</b> | <b>0.032</b>     |
|                                                                                                                                  |                  |       | <b>Month [level 'September']</b>               | <b>0.7759</b>  | <b>0.2178</b> | <b>3.563</b>  | <b>0.002</b>     |
|                                                                                                                                  |                  |       | Frame (Site × Month) [level 'July K-3']        | 1.0807         | 7.4705        | 0.145         | 0.886            |
|                                                                                                                                  |                  |       | <b>Frame (Site × Month) [level 'July V-3']</b> | <b>−1.3759</b> | <b>0.3420</b> | <b>−4.023</b> | <b>&lt;0.001</b> |
|                                                                                                                                  |                  |       | Frame (Site × Month) [level 'Sep K-1']         | 0.1191         | 0.1795        | 0.664         | 0.513            |
|                                                                                                                                  |                  |       | Frame (Site × Month) [level 'Sep V-1']         | 0.4981         | 0.3046        | 1.635         | 0.115            |
|                                                                                                                                  | Variance (Sigma) |       | Intercept                                      | −2.3113        | 0.6957        | −3.322        | 0.003            |
|                                                                                                                                  |                  |       | Site [level 'K']                               | −0.7719        | 0.4575        | −1.687        | 0.104            |
|                                                                                                                                  |                  |       | Month [level 'September']                      | 0.2564         | 0.6439        | 0.398         | 0.694            |
|                                                                                                                                  |                  |       | Frame (Site × Month) [level 'Jul K-3']         | 3.3916         | 6.4896        | 0.523         | 0.606            |
|                                                                                                                                  |                  |       | Frame (Site × Month) [level 'Jul V-3']         | −1.0385        | 0.8693        | −1.195        | 0.243            |

|                                                                 |               |               |              |              |
|-----------------------------------------------------------------|---------------|---------------|--------------|--------------|
| Frame (Site $\times$ Month) [level 'Sep K-1']                   | 0.7805        | 0.4442        | 1.757        | 0.091        |
| <b>Frame (Site <math>\times</math> Month) [level 'Sep V-1']</b> | <b>1.2077</b> | <b>0.3947</b> | <b>3.060</b> | <b>0.005</b> |

---

**Table S7.** Effects of plant part age (young or old), month (July or September), and location (sites K or V) on multivariate community structure of epibiosis on *Phycodrys rubens*: type III sum of squares PERMANOVA for 9999 permutations on fourth root transformed covers of sessile epibionts, Bray-Curtis similarity, replicate 0.25 m<sup>2</sup> frames included as a fixed effect nested in Site  $\times$  Month with two levels per site (see Methods for details). Auxiliary non-randomly sampled (in September only) five largest plants per frame not included. Smaller df Significant terms highlighted in bold. [f] – fixed effect, [r] – random effect.

| Source of Variation                                       |                             | df        | SS           | MS           | pseudo-F     | p             | Unique Permutations |
|-----------------------------------------------------------|-----------------------------|-----------|--------------|--------------|--------------|---------------|---------------------|
| Plants having both old and young parts ( $n = 51$ plants) | Site [f]                    | <b>1</b>  | <b>24681</b> | <b>24681</b> | <b>16.86</b> | <b>0.0001</b> | 9947                |
|                                                           | Month [f]                   | <b>1</b>  | <b>28677</b> | <b>28677</b> | <b>19.60</b> | <b>0.0001</b> | 9953                |
|                                                           | Age[f]                      | <b>1</b>  | <b>24172</b> | <b>24172</b> | <b>25.84</b> | <b>0.0001</b> | 9950                |
|                                                           | S $\times$ M [f]            | <b>1</b>  | <b>6419</b>  | <b>6419</b>  | <b>4.39</b>  | <b>0.0005</b> | 9940                |
|                                                           | S $\times$ A [f]            | <b>1</b>  | <b>2921</b>  | <b>2921</b>  | <b>3.12</b>  | <b>0.0068</b> | 9952                |
|                                                           | M $\times$ A [f]            | <b>1</b>  | <b>16015</b> | <b>16015</b> | <b>17.12</b> | <b>0.0001</b> | 9949                |
|                                                           | S $\times$ M $\times$ A [f] | <b>1</b>  | <b>1416</b>  | <b>1416</b>  | <b>1.51</b>  | <b>0.1794</b> | 9947                |
|                                                           | Frame (S $\times$ M) [f]    | <b>6</b>  | <b>9394</b>  | <b>1566</b>  | <b>1.07</b>  | <b>0.3642</b> | 9891                |
| Plant ID (F (S $\times$ M)) [r]                           |                             | <b>41</b> | <b>59995</b> | <b>1463</b>  | <b>1.56</b>  | <b>0.0003</b> | 9807                |
| Error                                                     |                             | 47        | 43960        | 935          |              |               |                     |
| Plants having only young parts ( $n = 39$ plants)         | Site [f]                    | <b>1</b>  | <b>2804</b>  | <b>2804</b>  | <b>2.78</b>  | <b>0.0219</b> | 9957                |
|                                                           | Month [f]                   | <b>1</b>  | <b>10579</b> | <b>10579</b> | <b>10.48</b> | <b>0.0001</b> | 9947                |
|                                                           | Frame (S $\times$ M)        | <b>3</b>  | <b>8047</b>  | <b>2682</b>  | <b>2.66</b>  | <b>0.0013</b> | 9930                |
|                                                           | S $\times$ M [f]            | <b>1</b>  | <b>4460</b>  | <b>4460</b>  | <b>4.42</b>  | <b>0.0011</b> | 9950                |
| Error                                                     |                             | 32        | 32291        | 1009         |              |               |                     |

**Table S8.** Effects of plant part size (surface Area of the corresponding part, cm<sup>2</sup>) and location (Sites K or V) on total cover of epibiosis on young and old parts of *Phycodrys rubens* in September 2015: beta-regression, mean (logit link) and variance (log link) modeled, replicate 0.25 m<sup>2</sup> frames included as a fixed effect nested in Site with two levels per site (see Methods for details). Significant terms in a mean model highlighted in bold.

| Age                     | Model               | Source of Variation               | Estimate       | SE            | t-value      | p                |
|-------------------------|---------------------|-----------------------------------|----------------|---------------|--------------|------------------|
| Young parts<br>(n = 80) | Mean (Mu)           | Intercept                         | −2.2541        | 0.0997        | −22.61       | <0.001           |
|                         |                     | <b>Site [level 'K']</b>           | <b>−0.3308</b> | <b>0.1340</b> | <b>−2.47</b> | <b>0.016</b>     |
|                         |                     | <b>Area</b>                       | <b>−0.0029</b> | <b>0.0012</b> | <b>−2.37</b> | <b>0.020</b>     |
|                         |                     | Frame (Site) [level 'K-1']        | 0.1154         | 0.1270        | 0.91         | 0.366            |
|                         |                     | Frame (Site) [level 'V-2']        | 0.0991         | 0.1513        | 0.66         | 0.545            |
|                         |                     | Site × Area                       | 0.0004         | 0.0015        | −0.24        | 0.811            |
|                         | Variance<br>(Sigma) | Intercept                         | −1.9211        | 0.2008        | −9.57        | <0.001           |
|                         |                     | Site [level 'K']                  | −0.2136        | 0.2697        | −0.79        | 0.431            |
|                         |                     | Area                              | −0.0136        | 0.0040        | −3.36        | 0.001            |
|                         |                     | Frame (Site) [level 'K-1']        | 0.1387         | 0.2469        | 0.56         | 0.576            |
|                         |                     | Frame (Site) [level 'V-2']        | 0.8329         | 0.2478        | 3.36         | 0.001            |
|                         |                     | Site × Area                       | 0.0100         | 0.0045        | 2.20         | 0.031            |
| Old parts<br>(n = 46)   | Mean (Mu)           | Intercept                         | −1.6669        | 0.3269        | −5.10        | <0.001           |
|                         |                     | Site [level 'K']                  | 0.4184         | 0.3469        | 1.21         | 0.234            |
|                         |                     | <b>Area</b>                       | <b>0.0725</b>  | <b>0.0233</b> | <b>3.11</b>  | <b>0.003</b>     |
|                         |                     | <b>Frame (Site) [level 'K-1']</b> | <b>1.8232</b>  | <b>0.2531</b> | <b>7.20</b>  | <b>&lt;0.001</b> |
|                         |                     | Frame (Site) [level 'V-2']        | 0.0874         | 0.3569        | 0.25         | 0.808            |
|                         |                     | <b>Site × Area</b>                | <b>−0.1001</b> | <b>0.0238</b> | <b>−4.20</b> | <b>&lt;0.001</b> |
|                         | Variance<br>(Sigma) | Intercept                         | −0.6596        | 0.3505        | −1.88        | 0.067            |
|                         |                     | Site [level 'K']                  | −1.1600        | 0.4515        | −2.57        | 0.014            |
|                         |                     | Area                              | 0.0049         | 0.0254        | 0.19         | 0.848            |
|                         |                     | Frame (Site) [level 'K-1']        | 3.2681         | 0.3490        | 9.36         | <0.001           |
|                         |                     | Frame (Site) [level 'V-2']        | 0.2276         | 0.3898        | 0.58         | 0.563            |
|                         |                     | Site × Area                       | −0.0527        | 0.0272        | −1.93        | 0.060            |

**Table S9.** Effects of plant part size (surface Area of the corresponding part, cm<sup>2</sup>) and location (Sites K or V) on the number of species and diversity ( $H'$ ) on young and old plant parts of *Phycodrys rubens* in September 2015: type III sum of squares ANCOVAs, replicate 0.25 m<sup>2</sup> frames included as a fixed effect nested in Site with two levels per site (see Methods for details). Arrows show the sign of the relationship where covariate effect or interaction is significant. Significant terms highlighted in bold.

| Age         | Parameter               | Source of Variation | df       | Sum of Squares | F-value       | $p$              |       |
|-------------|-------------------------|---------------------|----------|----------------|---------------|------------------|-------|
| Young parts | $H'$ (based on % cover) | Site                | 1        | 0.0005         | 0.005         | 0.943            |       |
|             |                         | <b>Area</b>         | <b>1</b> | <b>1.7016</b>  | <b>18.382</b> | <b>&lt;0.001</b> | ↑     |
|             |                         | Frame (Site)        | 2        | 0.1466         | 0.792         | 0.457            |       |
|             |                         | <b>Site × Area</b>  | <b>1</b> | <b>1.0697</b>  | <b>11.555</b> | <b>0.001</b>     | K↑ V↑ |
|             |                         | Error               | 74       | 6.8503         |               |                  |       |
|             | Number of species       | Site                | 1        | 19.9           | 3.013         | 0.087            |       |
|             |                         | <b>Area</b>         | <b>1</b> | <b>647.3</b>   | <b>98.126</b> | <b>&lt;0.001</b> | ↑     |
|             |                         | Frame (Site)        | 2        | 3.4            | 0.256         | 0.775            |       |
|             |                         | <b>Site × Area</b>  | <b>1</b> | <b>71.2</b>    | <b>10.787</b> | <b>0.002</b>     | K↑ V↑ |
|             |                         | Error               | 74       | 488.1          |               |                  |       |
| Old parts   | $H'$ (based on % cover) | Site                | 1        | 0.3757         | 1.716         | 0.198            |       |
|             |                         | Area                | 1        | 0.2804         | 1.281         | 0.265            |       |
|             |                         | <b>Frame (Site)</b> | <b>2</b> | <b>1.9934</b>  | <b>4.552</b>  | <b>0.017</b>     |       |
|             |                         | Site × Area         | 1        | 0.7530         | 3.439         | 0.071            |       |
|             |                         | Error               | 40       | 8.7586         |               |                  |       |
|             | Number of species       | Site                | 1        | 33.7           | 2.898         | 0.096            |       |
|             |                         | <b>Area</b>         | <b>1</b> | <b>526.8</b>   | <b>45.284</b> | <b>&lt;0.001</b> | ↑     |
|             |                         | Frame (Site)        | 2        | 59.4           | 2.554         | 0.090            |       |
|             |                         | Site × Area         | 1        | 4.0            | 0.343         | 0.561            |       |
|             |                         | Error               | 40       | 465.3          |               |                  |       |

**Table S10.** Effects of plant part size (surface Area of the corresponding part, cm<sup>2</sup>) and location (Sites K or V) on multivariate community structure of epibiosis on young and old plant parts of *Phycodrys rubens* in September 2015: type III sum of squares PERMANOVA for 9999 permutations on fourth root transformed covers of sessile epibionts, Bray-Curtis similarity, replicate 0.25 m<sup>2</sup> frames included as a fixed effect nested in Site with two levels per site (see Methods for details). Significant terms highlighted in bold.

| Age         | Source of Variation | df | SS    | MS    | pseudo-F | <i>p</i> | Unique Permutations |
|-------------|---------------------|----|-------|-------|----------|----------|---------------------|
| Young parts | Area                | 1  | 5107  | 5107  | 6.28     | 0.0001   | 9943                |
|             | Site                | 1  | 13817 | 13817 | 16.99    | 0.0001   | 9938                |
|             | Frame (Site)        | 2  | 2842  | 1421  | 1.75     | 0.0362   | 9937                |
|             | Site × Area         | 1  | 1563  | 1563  | 1.92     | 0.0650   | 9917                |
|             | Error               | 74 | 60185 | 813   |          |          |                     |
| Old parts   | Area                | 1  | 4954  | 4954  | 4.54     | 0.0001   | 9938                |
|             | Site                | 1  | 9736  | 9736  | 8.92     | 0.0001   | 9940                |
|             | Frame (Site)        | 2  | 6122  | 3061  | 2.80     | 0.0002   | 9908                |
|             | Site × Area         | 1  | 2294  | 2294  | 2.10     | 0.0296   | 9946                |
|             | Error               | 40 | 43660 | 1092  |          |          |                     |

**Table S11.** Effects of plant part size (surface Area of the corresponding part, cm<sup>2</sup>) and location (Sites K or V) and on mean individual size (approximated area occupied, mm<sup>2</sup>) of 5 top abundant species on young and old plant parts of *Phycodrys rubens* in September 2015: type III sum of squares ANCOVAs, frames pooled. Arrows show the sign of the relationship where covariate or interaction effect is significant. Significant terms highlighted in bold.

| Age         | Species                     | Source of Variation                  | df       | Sum of Squares                          | F-value        | p                |       |
|-------------|-----------------------------|--------------------------------------|----------|-----------------------------------------|----------------|------------------|-------|
| Young parts | <i>Cribrilina annulata</i>  | Site                                 | 1        | $9.86 \times 10^{-6}$                   | 0.3461         | 0.558            |       |
|             |                             | Area                                 | 1        | $1.00 \times 10^{-6}$                   | 0.0351         | 0.852            |       |
|             |                             | Site $\times$ Area                   | 1        | $2.33 \times 10^{-5}$                   | 0.8181         | 0.369            |       |
|             |                             | Error                                | 76       | 0.0020                                  |                |                  |       |
|             | <i>Electra pilosa</i>       | <b>Site</b>                          | <b>1</b> | <b>0.0014</b>                           | <b>12.8543</b> | <b>&lt;0.001</b> | V>K   |
|             |                             | Area                                 | 1        | $1.54 \times 10^{-6}$                   | 0.0141         | 0.906            |       |
|             |                             | Site $\times$ Area                   | 1        | $7.80 \times 10^{-7}$                   | 0.0072         | 0.933            |       |
|             |                             | Error                                | 76       | 0.0069                                  |                |                  |       |
|             | <i>Celleporella hyalina</i> | <b>Site</b>                          | <b>1</b> | <b>0.0003</b>                           | <b>4.0997</b>  | <b>0.047</b>     | V>K   |
|             |                             | <b>Area</b>                          | <b>1</b> | <b>0.0004</b>                           | <b>5.4123</b>  | <b>0.023</b>     | ↓     |
|             |                             | Site $\times$ Area                   | 1        | $3.57 \times 10^{-5}$                   | 0.5387         | 0.466            |       |
|             |                             | Error                                | 76       | 0.0043                                  |                |                  |       |
|             | <i>Circeis armoricana</i>   | Site                                 | 1        | $3.74 \times 10^{-7}$                   | 0.5828         | 0.448            |       |
|             |                             | Area                                 | 1        | $1.19 \times 10^{-6}$                   | 1.8561         | 0.177            |       |
|             |                             | <b>Site <math>\times</math> Area</b> | <b>1</b> | <b><math>3.59 \times 10^{-6}</math></b> | <b>5.6021</b>  | <b>0.021</b>     | K↓ V↑ |
|             |                             | Error                                | 76       | $4.88 \times 10^{-5}$                   |                |                  |       |
|             | Porifera                    | Site                                 | 1        | 0.0151                                  | 1.3162         | 0.257            |       |
|             |                             | Area                                 | 1        | 0.0223                                  | 1.9498         | 0.169            |       |
|             |                             | Site $\times$ Area                   | 1        | 0.0076                                  | 0.6614         | 0.420            |       |
|             |                             | Error                                | 76       | 0.5378                                  |                |                  |       |
| Old parts   | <i>Cribrilina annulata</i>  | Site                                 | 1        | $3.05 \cdot 10^{-5}$                    | 0.6365         | 0.432            |       |
|             |                             | Area                                 | 1        | $2.76 \times 10^{-5}$                   | 0.5759         | 0.455            |       |
|             |                             | Site $\times$ Area                   | 1        | $3.91 \times 10^{-5}$                   | 0.8141         | 0.375            |       |
|             |                             | Error                                | 42       | 0.0013                                  |                |                  |       |
|             | <i>Electra pilosa</i>       | Site                                 | 1        | 0.0013                                  | 2.2583         | 0.143            |       |
|             |                             | Area                                 | 1        | $1.01 \times 10^{-5}$                   | 0.0017         | 0.967            |       |
|             |                             | Site $\times$ Area                   | 1        | $1.85 \times 10^{-5}$                   | 0.0032         | 0.955            |       |
|             |                             | Error                                | 42       | 0.0181                                  |                |                  |       |
|             | Juvenile mytilids           | Site                                 | 1        | 0.0024                                  | 1.8196         | 0.195            |       |
|             |                             | Area                                 | 1        | 0.0002                                  | 0.1323         | 0.721            |       |
|             |                             | Site $\times$ Area                   | 1        | 0.0007                                  | 0.4881         | 0.494            |       |
|             |                             | Error                                | 42       | 0.0228                                  |                |                  |       |
|             | <i>Circeis armoricana</i>   | Site                                 | 1        | $3.80 \times 10^{-9}$                   | 0.0023         | 0.962            |       |
|             |                             | Area                                 | 1        | $5.72 \times 10^{-6}$                   | 3.4214         | 0.073            |       |
|             |                             | <b>Site <math>\times</math> Area</b> | <b>1</b> | <b><math>8.13 \times 10^{-6}</math></b> | <b>4.8581</b>  | <b>0.035</b>     | K↑ V↓ |
|             |                             | Error                                | 42       | $5.52 \cdot 10^{-5}$                    |                |                  |       |
|             | Porifera                    | Site                                 | 1        | 0.5229                                  | 1.0624         | 0.309            |       |
|             |                             | <b>Area</b>                          | <b>1</b> | <b>2.7079</b>                           | <b>5.5020</b>  | <b>0.024</b>     | ↑     |
|             |                             | <b>Site <math>\times</math> Area</b> | <b>1</b> | <b>2.8871</b>                           | <b>5.8661</b>  | <b>0.020</b>     | K- V↑ |
|             |                             | Error                                | 42       | 20.179                                  |                |                  |       |

© 2019 by the authors. Submitted for possible open access publication under the terms and conditions of the Creative Commons Attribution (CC BY) license (<http://creativecommons.org/licenses/by/4.0/>).
